# Supplementary material
Source: ML conference proceedings conference paper supplement (https://openreview.net/forum?id=AAes_3W-2z)
Supplement: supplementary_material [file attachment]

# Wasserstein Embedding for Graph Learning (WEGL)

This repository contains the code accompanying our paper titled *Wasserstein Embedding for Graph Learning (WEGL)*. WEGL is a novel and fast framework for embedding entire graphs in a vector space, in which various machine learning models are applicable for graph-level prediction tasks. Our proposed approach embeds a graph into a Hilbert space, where the  $\ell_2$  distance between two embedded graphs provides a true metric between the graphs that approximates their 2-Wasserstein distance. For a set of  $M$  graphs, the proposed method provides:

- Reduced computational complexity of estimating the graph Wasserstein distance [togninalli2019wasserstein] for a dataset of  $M$  graphs from a quadratic complexity in the number of graphs, i.e.,  $\frac{M(M-1)}{2}$  calculations, to linear complexity, i.e.,  $M$  calculations of the Wasserstein distance; and
- An explicit Hilbertian embedding for graphs, which is not restricted to kernel methods, and therefore can be used in conjunction with any downstream classification framework.

The Figure shown below, visualizes WEGL's process for embedding graphs into a linear Wasserstein embedding (aka, the linear optimal transport embedding).

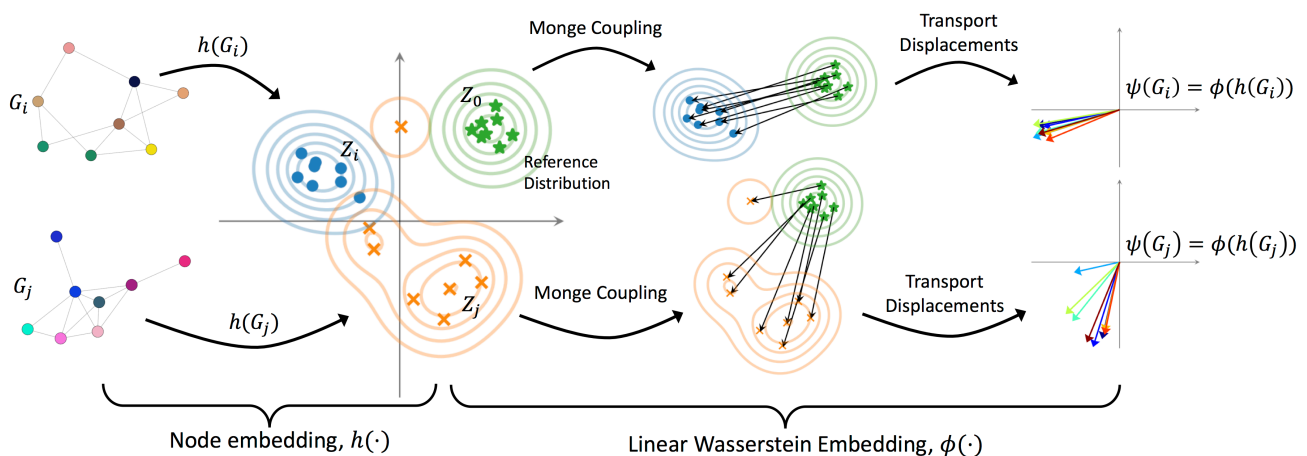

Fig 1. Our proposed graph embedding framework, WEGL, combines node embedding methods with the linear Wasserstein embedding framework described.

# Requirements

- PyTorch
- PyTorch Geometric
- Scikit-Learn (pip install scikit-learn)
- OGB (pip install ogb)
- POT (pip install pot)
- PrettyTable (pip install prettytable)
- TQDM (pip install tqdm)

# Code

- LOT.ipynb: An i-PythonNotebook tutorial for the Linear Optimal Transport framework.
- WEGL\_RandomForest\_ogbg\_molhiv\_VirtualNode.ipynb: Demo of *WEGL* on the OGB-MOLHIV dataset.

# References

[togninalli2019wasserstein] Togninalli, M., Ghisu, E., Llinares-López, F., Rieck, B. and Borgwardt, K., 2019. Wasserstein weisfeiler-lehman graph kernels. In *Advances in Neural Information Processing Systems* (pp. 6436–6446).

# License

HRLAnalysis(TM) Software License – Version 1.0 – August 27th, 2013
